# Supplementary material
Source: PubMed Central journal article supplement (PMC4378156)
Supplement: supp_pp.114.253377_253377revsuppfile.pdf [file supp_pp.114.253377_253377revsuppfile.pdf]

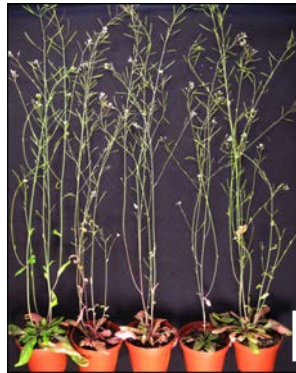

|                        |     |     |     |     |     |
|------------------------|-----|-----|-----|-----|-----|
| <i>vfd1(fyve1-2)</i> : | +/+ | +/+ | +/- | -/- | -/- |
| <i>35Spro:FYVE1</i> :  | -   | +   | +   | +   | +   |
| <i>35Spro:FYVE1</i>    |     |     |     |     |     |
| <i>ACTIN2</i>          |     |     |     |     |     |

**Supplemental Figure 1. Complementation of the *vfd1(fyve1-2)* mutant.**

Photographs of *vfd1/fyve1-2* mutant lines that express a *35Spro:FYVE1* construct are shown in comparison to wild-type plant at the same age (upper panel). Expression of the transgene was verified by RT-PCR using transgene- and *ACTIN2*-specific primers (bottom panel). Scale bar: 6 cm.

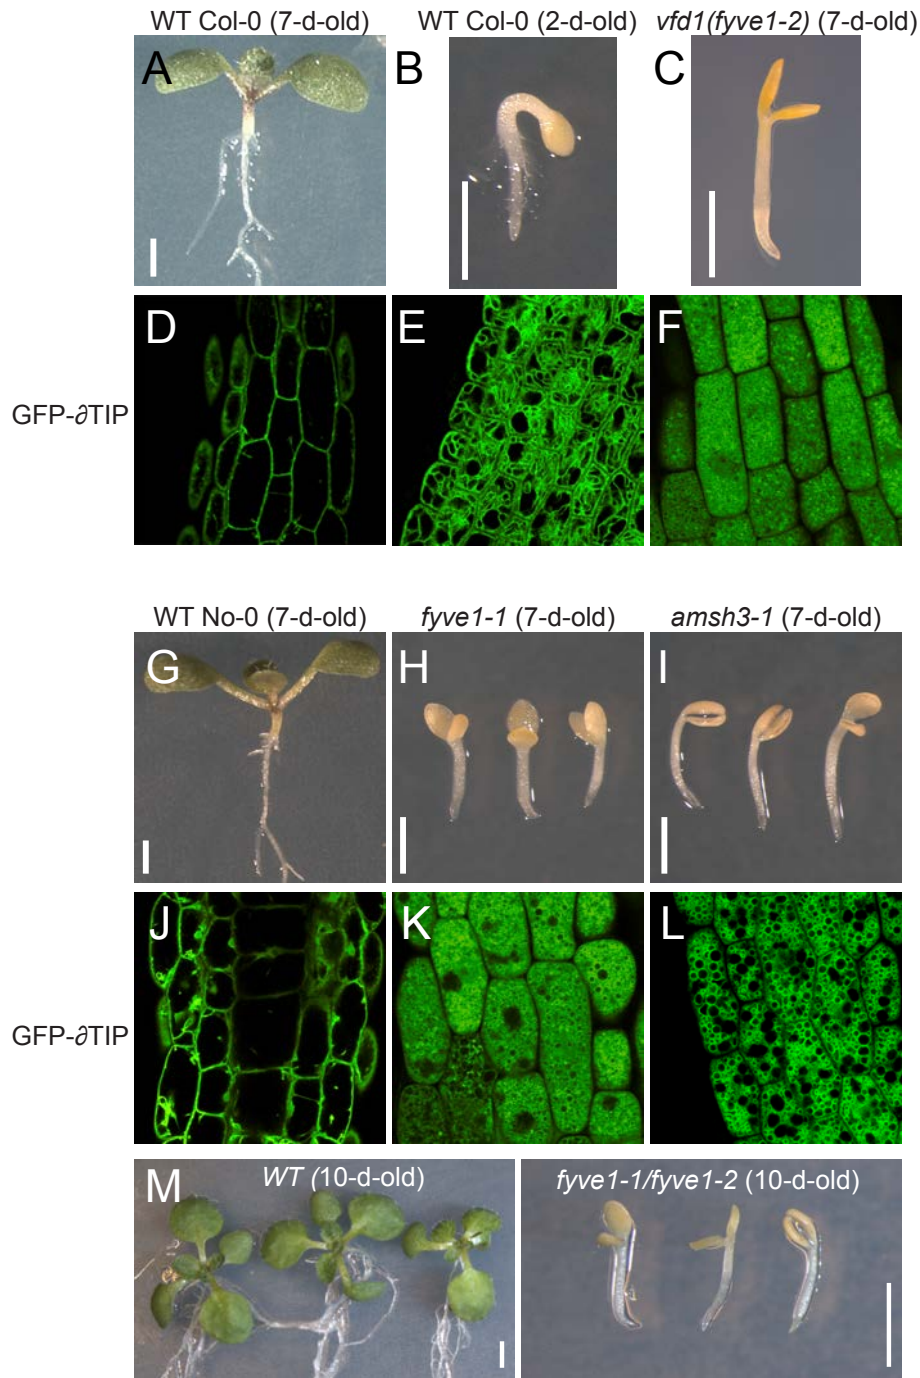

**Supplemental Figure 2. Seedling- and vacuole phenotypes of *fyve1-1*, *fyve1-2* and *amsh3-1*.**

(A to F) Photographs of the seedling and vacuole phenotypes of 7-day-old (A and D) and 2-day-old (B and E) wild type (Col-0) and 7-day-old *vfd1fyve1-2* mutant (C and F) are shown. Note that the *vfd1/fyve1-2* seedling is approximately the size of a 2-day-old wild-type seedling. Vacuolar membranes of the seedlings are visualized with the GFP- $\Delta$ TIP marker. (G to L) Photographs of the seedling and vacuole phenotypes of 7-day-old wild type (No-0) (G and J), 7-day-old *fyve1-1* (H and K) and 7-day-old *amsh3-1* (I and L) are shown. Scale bars: 1mm. (M) Transheterozygous *fyve1-1/fyve1-2* mutants show the same seedling lethal phenotype as the *fyve1-1-*, *fyve1-2* homozygous mutants. Scale bars: 2 mm.

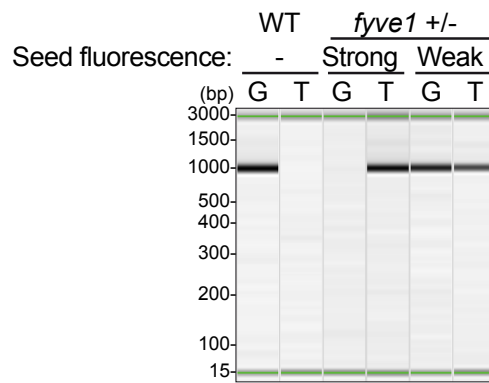

**Supplemental Figure 3. Seeds with strong green fluorescence are homozygous for the *fyve1-1* transposon insertion.**

PCR-based genotyping analysis was conducted using genomic DNA extracted from seeds from wild type or a *fyve1-1* heterozygous plant containing GFP-CT24. Among the seeds derived from a heterozygous mother plant, seeds with strong and weak green fluorescence observed. 10 seeds from each population shown in Figure 5A were subjected to genotyping analysis. Lanes G indicate gene-specific PCR products and Lanes T indicate transposon-specific PCR products. Note that the pool of strongly fluorescing seeds correspond to homozygous *fyve1-1*.

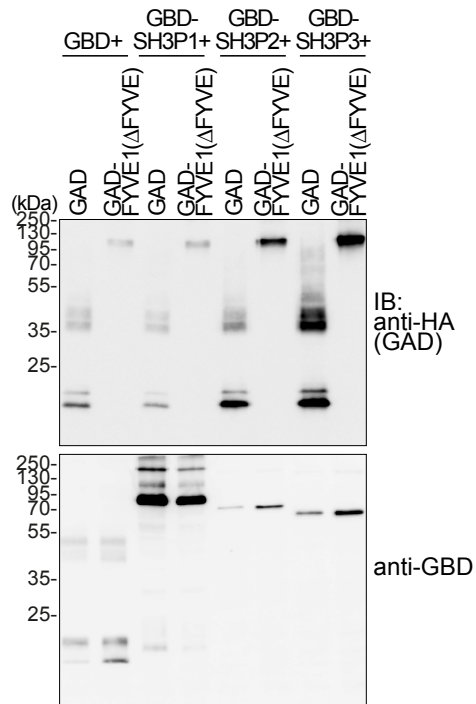

**Supplemental Figure 4. Expression of the constructs used for YTH analysis.**

Immunoblot of yeast total protein extracts from yeast cells used in Figure 8. Anti-HA and anti-GBD antibodies were used to detect GAD- and GBD-fused proteins, respectively. The GAD-fusion vector pGADT7 contains an HA-tag enabling the detection of the fusion protein with an anti-HA antibody.

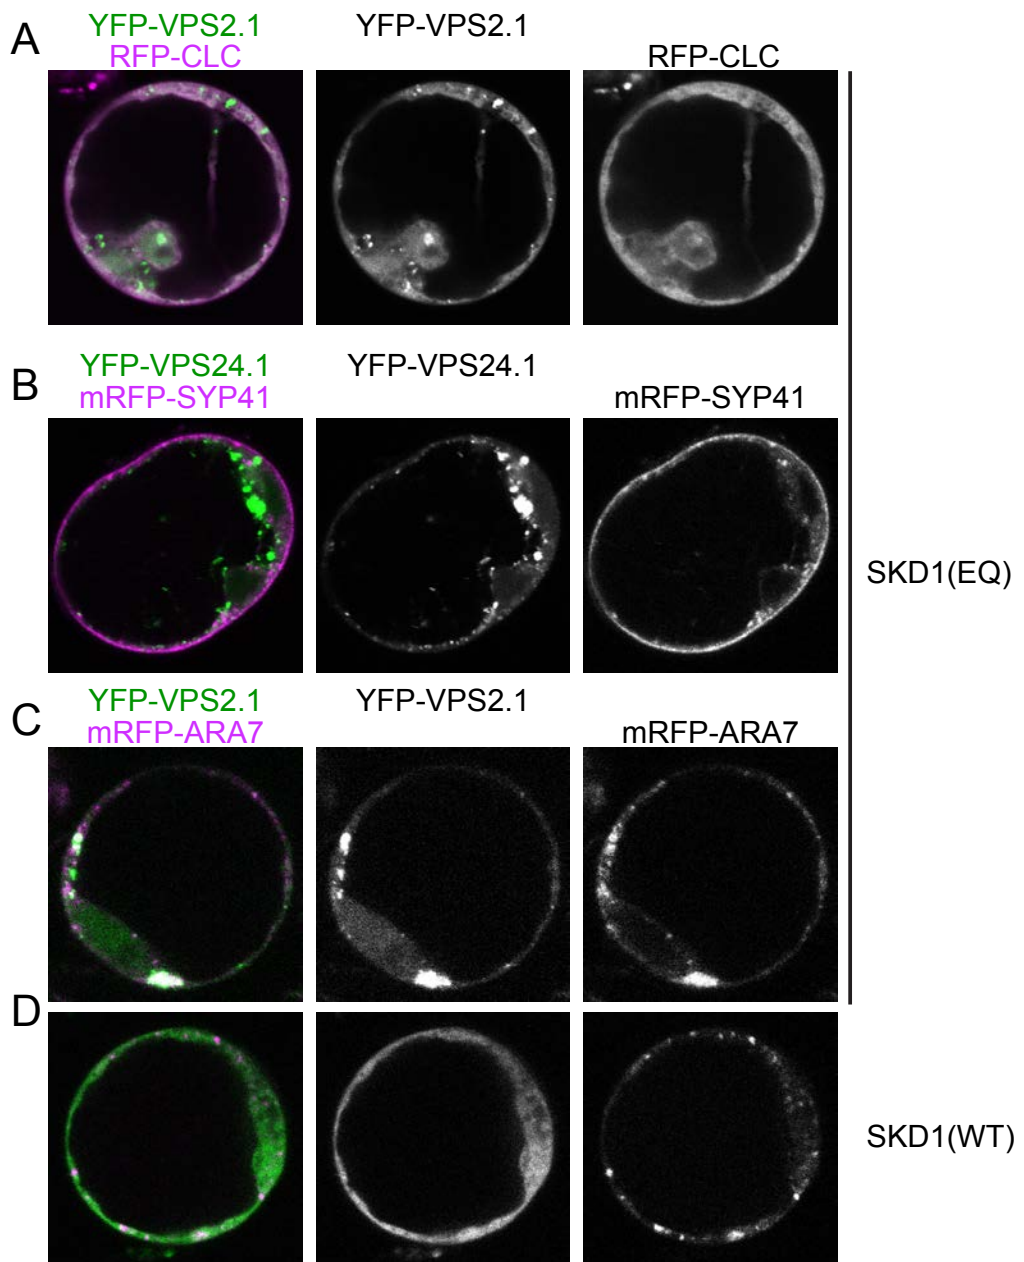

**Supplemental Figure 5. Coexpression of SKD1(EQ) specifically affect the late endosomal marker ARA7.**

Localization of ESCRT-III subunits YFP-VPS2.1 or YFP-VPS24.1 together with RFP-CLC (A), the TGN/early endosome-marker mRFP-SYP43 (B) and the late endosome marker mRFP-ARA7 (C) upon co-expression with SKD1 (EQ). Localization of YFP-VPS2.1 and mRFP-ARA7 upon coexpression with SKD1(WT) is shown in (D). Note that only mRFP-ARA7 relocates to the SKD1(EQ)-induced class-E compartments together with the ESCRT-III subunit VPS2.1.

Supplemental Table 1: Primers used in this study

| Primer                        | Sequence                                            |
|-------------------------------|-----------------------------------------------------|
| CK40 FYVE1 GW fw              | GGGGACAAGTTTGTACAAAAAAGCAGGCTATGCAACA<br>GGGAGATTAC |
| CK41 FYVE1 GW fw              | GGGGACCACTTTGTACAAGAAAGCTGGGTTCAATGTG<br>CGCTAACGAG |
| CK131 FYVE1 GW fw             | GGGGACAAGTTTGTACAAAAAAGCAGGCTTGCAACAG<br>GGAGATTAC  |
| CK140 ΔFYVE fw                | GGCATTACTCAACCTATTAACAGGCTTTAT                      |
| CK141ΔFYVE rv                 | ATAAAGCCTGTTAATAGGTTGAGTAATGCC                      |
| EI511 Genotyping fw           | GCGACATCACTAAACCC                                   |
| EI512 Genotyping rv           | AACCCACCAACATAAGAAC                                 |
| EI528 FYVE fw Bam             | AAGGGGATCCGCAACCGTAGCTGGTC                          |
| EI529 FYVE rv Sal             | AAGGGTCGACAAAGCTAATGGATCGTCC                        |
| EI541 tFYVE1 qRT fw           | GCAACAGGGAGATTACAATTCG                              |
| EI542 tFYVE1 qRT rv           | TCGGAGTAGGATTTTGAATTGA                              |
| MN53 SH3P2 GW fw              | AAAAAGCAGGCTATGGATGCAATTAGAAAACA                    |
| MN54 SH3P2 GW rv              | AGAAAGCTGGGTTGAAACTTCGGACACTTTG                     |
| MN215 SH3P1 fw NcoI           | AAGGCCATGGTGATCATCACAATCATC                         |
| MS8 SH3P1 rv XhoI             | GGAACTCGAGTCACTGTTGCTTGGAGTT                        |
| MS9 SH3P3 fw EcoRI            | GGAAGAATTCATGGATGCGTTTAGAAGAC                       |
| MS10 SH3P3 rv Sall            | GGAAGTCGACTCAGTAACTTCAGCAGCA                        |
| MS11 SH3P2 fw EcoRI           | GGAAGAATTCAGTGATGCAATTAGAAAACA                      |
| MS12 SH3P2 rv Sall            | GGAAGTCGACTCAGAAACTTCGGACACT                        |
| SH3P2-up5 fw                  | CACCCACACCAATGGCGACATAAC                            |
| SH3P2-dw3 rv                  | CTATCAAATAAAAGAAGATCC                               |
| VC11 FYVE1(ΔFYVE) fw<br>BamHI | AAGGGGATCCGTATGCAACAGGGAGATTACA                     |
| VC12 FYVE1(ΔFYVE) rv<br>Sall  | AAGGGTCGACTCAATGTGCGCTAACG                          |
| ACTIN fw                      | GGGCTGTTTTTCCCA                                     |
| ACTIN rv                      | GGCCTTGGAGATCCA                                     |
| Ds5-2a                        | TCCGTTCCGTTTTCGTTTTTTAC                             |
